# Supplementary material for: Meta-Analysis of Grainyhead-Like Dependent Transcriptional Networks: A Roadmap for Identifying Novel Conserved Genetic Pathways
Source: PubMed Central journal article supplement (PMC6896185; doi:10.3390/genes10110876), 2019-10-31
Supplement: genes-10-00876-s001.pdf [file genes-10-00876-s001.pdf]

**Table S1.** Oligonucleotide sequences used in the present study.

| <b>Zebrafish gene</b> | <b>Forward primer</b> | <b>Reverse primer</b>    |
|-----------------------|-----------------------|--------------------------|
| cldn23a               | CAACCAACAAGGCAACGACC  | CAAGCCGAGAGCAGTTACGA     |
| cldn23b               | TTCCCCACTCCCCAAATCG   | CCAGATCGATTGACTCCCCG     |
| ppl                   | CTGTGGCCAGTGCTGACA    | TCCTGTACTCTCCTTCTTGAGC   |
| prom2                 | AGGACCTTTGCTTGGTGGAT  | GCATCAATCTTGGGTTTCGGC    |
| Gm3579<br>(exd2)      | CCACTGAGCCCATTCTAGCC  | GACACACGAACTCTTTTTACCCA  |
| oclna                 | GGTCTGCTGGCTGACTATCC  | GACTGAATTACGGACGGGCA     |
| oclnb                 | CTCTCAAGGCATCGGGGAAT  | GGAGGATATTCATCTGTGTCAAGC |
| slc6a19a.1            | TCAGCAGCTCAACATCAGCA  | ATCTCTTGGGCAGCAGGTTC     |
| slc6a19a.2            | CATCGATTTACGCCGCCATC  | CAGAAACGTCTGCATGTCGC     |
| slc6a19b              | CCTTGGCTTGTCTCCATGT   | GTCAAATAGGGCCAGCCAGT     |
| aldh1a3               | TTCCTGGATTTGGACCGACG  | ATAGACTCGTGATGCAGCGG     |
| sod3a                 | ACATTCTCCGAGTTCAGACGG | CCTCTTTGTATGTGAAGCGCC    |
| sod3b                 | TGGCCCAAAGGAAAAGCTGA  | GGATTCCAGTGAAGTCCGAA     |
| car6 (ca6)            | GACCCTGTGGAACGACTACC  | GCTTGCCTTGAACCGCTTTT     |
| cldna                 | CGCTGTTGATTATTGGCGGG  | CCCTTGGTTCCTCCAGATCG     |
| cldnb                 | GGTGCCTCAGCTCTGTTGAT  | AAGTTCTTCCGGAGGGTGC      |
| evlpa                 | CACTAAACCGCACTGACCCT  | TTGGGCTGCAACTCTCTGTT     |
| evlpb                 | AGACGTTCACTGAGTCGCTG  | TTACCTTCTACCGCGCTTT      |
| ef1 $\alpha$          | TTGGAAACGGATATGCTCCA  | TCCTTACCTGAACGCCTGTCA    |

**Table S2.** Zebrafish orthologues of differentially regulated mammalian genes. The top 10 differentially regulated genes following *Grhl*-dependent modulation in primary epithelia that had identifiable zebrafish orthologues, showing the function of each gene in mammals. Zebrafish orthologues of these ten mammalian genes comprise a total of 18 separate genes.

| <b>Grhl targets - Primary epithelia</b> |                |                                           |                                         |                                                                                                         |
|-----------------------------------------|----------------|-------------------------------------------|-----------------------------------------|---------------------------------------------------------------------------------------------------------|
| <b>Rank</b>                             | <b>Gene</b>    | <b>Gene name</b>                          | <b>Zebrafish orthologue(s)</b>          | <b>Function</b>                                                                                         |
| 1                                       | <b>Cldn23</b>  | Claudin 23                                | <i>cldn23a, cldn23b</i>                 | Integral membrane proteins and components of tight junctions                                            |
| 2                                       | <b>Ppl</b>     | Periplakin                                | <i>ppl</i>                              | Components of desmosomes and of the epidermal cornified envelope in keratinocytes                       |
| 3                                       | <b>Prom2</b>   | Prominin 2                                | <i>prom2</i>                            | Membrane glycoproteins                                                                                  |
| 4                                       | <b>Ocln</b>    | Occludin                                  | <i>oclna, ocldb</i>                     | Integral membrane proteins and components of tight junction strands                                     |
| 5                                       | <b>Slc6a19</b> | Solute Carrier 6 Family Member 19         | <i>slc6a19a.1, slc6a19a.2, slc6a19b</i> | Mediates resorption of neutral amino acids across the apical membrane of renal and intestinal epithelia |
| 6                                       | <b>Aldh1a3</b> | Aldehyde Dehydrogenase 1 Family Member A3 | <i>aldh1a3</i>                          | Catalyzes the formation of retinoic acid                                                                |
| 7                                       | <b>SOD3</b>    | Superoxide Dismutase 3                    | <i>sod3a, sod3b</i>                     | Protection of brain, lungs and other tissues from oxidative stress                                      |
| 8                                       | <b>Car6</b>    | Carbonic Anhydrase 6                      | <i>car6</i>                             | Reversible hydration of carbon dioxide                                                                  |
| 9                                       | <b>Cldn4</b>   | Claudin 4                                 | <i>cldna, cldnb</i>                     | Integral membrane protein                                                                               |
| 10                                      | <b>Evpl</b>    | Envoplakin                                | <i>evpla, evplb</i>                     | Component of the cornified envelope of keratinocytes                                                    |
